# Supplementary material
Source: Springer Nature journal article supplement (https://www.springermedizin.de/resource/supplementary/12933_2010_236_MOESM1_ESM.pdf/9539906)

$P < 0.001$

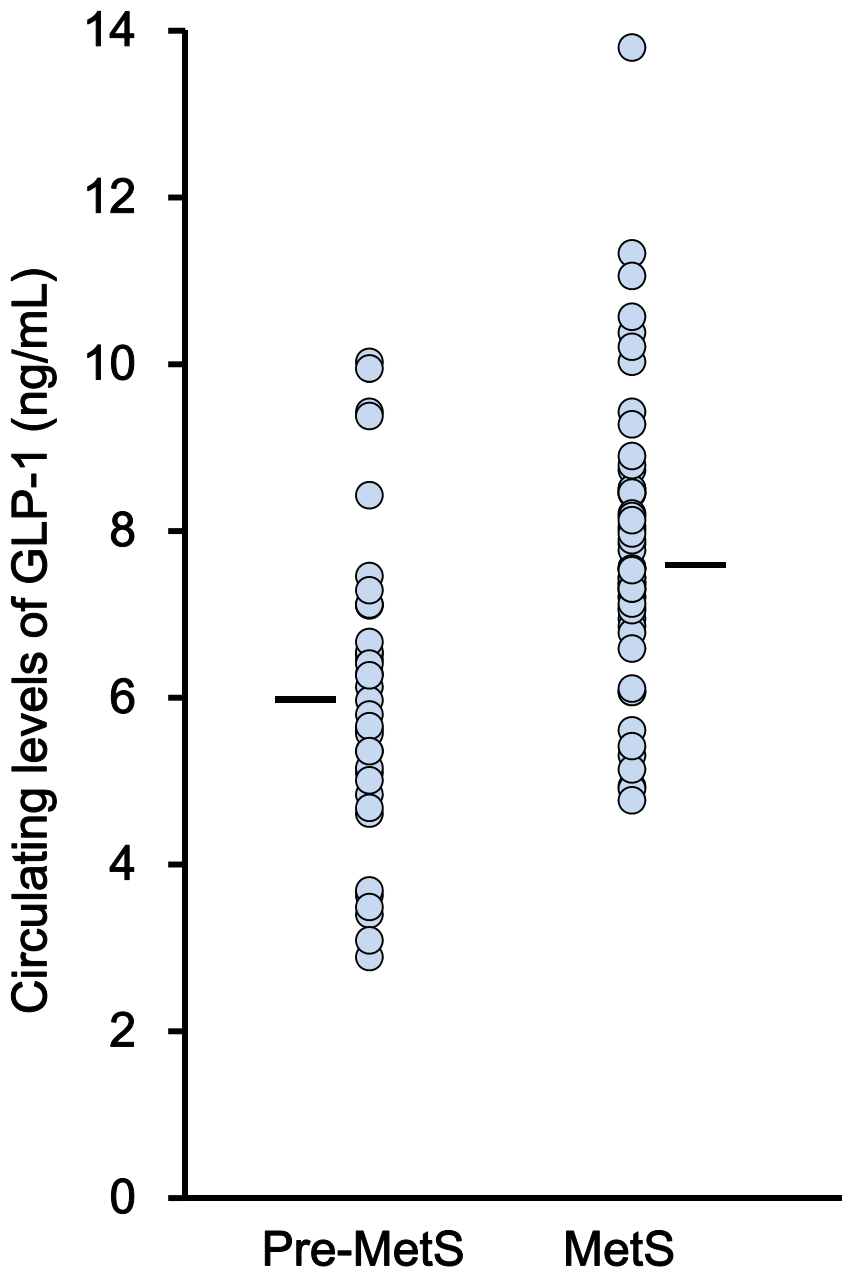

Supplement: MOESM1 [file 9539906]
